# Supplementary material for: Flavonoid-Labeled Biopolymer in the Structure of Lipid Membranes to Improve the Applicability of Antioxidant Nanovesicles
Source: MDPI journal article supplement (doi:10.3390/pharmaceutics16010141), 2024-01-20
Supplement: s1 [file s1]

## Supporting Information for:

### Flavonoid-Labeled Biopolymer in the Structure of Lipid Membranes to Improve the Applicability of Antioxidant Nanovesicles

Patrick D. Mathews <sup>1,2</sup>, Gabriella S. Gama <sup>1</sup>, Hector M. Megiati <sup>1</sup>, Rafael R. M. Madrid <sup>1</sup>, Bianca B. M. Garcia <sup>3</sup>, Sang W. Han <sup>3</sup>, Rosangela Itri <sup>4</sup> and Omar Mertins <sup>1,\*</sup>

<sup>1</sup> Laboratory of Nano Bio Materials (LNBM), Department of Biophysics, Paulista Medical School, Federal University of Sao Paulo, Sao Paulo 04023-062, Brazil; patrick.mathews@unesp.br (P.D.M.); gabgamasantos@gmail.com (G.S.G.); hectormegiati@gmail.com (H.M.M.); rafael.madrid@unifesp.br (R.R.M.M.)

<sup>2</sup> Institute of Biosciences, Sao Paulo State University, Botucatu 18618-689, Brazil

<sup>3</sup> Interdisciplinary Center for Gene Therapy, Paulista Medical School, Federal University of Sao Paulo, Sao Paulo 04023-062, Brazil; bianca.bonetto@unifesp.br (B.B.M.G.); sang.han@unifesp.br (S.W.H.)

<sup>4</sup> Applied Physics Department, Institute of Physics, University of Sao Paulo, Sao Paulo 05508-900, Brazil; itri@if.usp.br

\* Correspondence: mertins@unifesp.br

**Table S1: CHCa concentrations.** Sample C1 was initially prepared in HAc 175 mM, and subsequent dilutions were made in OPTI-MEM.

|                 | C1     | C2    | C3    | C4    | C5    | C6    | C7    | C8    | C9    |
|-----------------|--------|-------|-------|-------|-------|-------|-------|-------|-------|
| [Inicial] (μM)  | 146.70 | 73.35 | 36.68 | 18.34 | 9.17  | 4.58  | 2.29  | 1.15  | 0.57  |
| V (μL per well) | 10.00  | 10.00 | 10.00 | 10.00 | 10.00 | 10.00 | 10.00 | 10.00 | 10.00 |
| Vf well (μL)    | 110    | 110   | 110   | 110   | 110   | 110   | 110   | 110   | 110   |
| [Final] (μM)    | 13.34  | 6.67  | 3.33  | 1.67  | 0.83  | 0.42  | 0.21  | 0.10  | 0.05  |

**Table S2: HAc concentrations.** Sample HAc1 was initially prepared in water, and subsequent dilutions made in OPTI-MEM.

|                 | HAc1    | HAc2    | HAc3    | HAc4    | HAc5   | HAc6   | HAc7   | HAc8   | HAc9  |
|-----------------|---------|---------|---------|---------|--------|--------|--------|--------|-------|
| [Inicial] (mM)  | 175.00  | 87.50   | 43.75   | 21.88   | 10.94  | 5.47   | 2.73   | 1.37   | 0.68  |
| V (μL per well) | 10.00   | 10.00   | 10.00   | 10.00   | 10.00  | 10.00  | 10.00  | 10.00  | 10.00 |
| Vf well (μL)    | 110     | 110     | 110     | 110     | 110    | 110    | 110    | 110    | 110   |
| [Final] (μM)    | 1.6E+04 | 8.0E+03 | 4.0E+03 | 2.0E+03 | 1.E+03 | 497.16 | 248.58 | 124.29 | 62.14 |
